# Supplementary material for: Chemical Characterization and Metagenomic Identification of Endophytic Microbiome from South African Sunflower (Helianthus annus) Seeds
Source: MDPI journal article supplement (doi:10.3390/microorganisms11040988), 2023-04-10
Supplement: s1 [file s1]

# Chemical characterization and metagenomic identification of endophytic microbiome from South African sunflower (*Helianthus annuus*) seeds

Fatai Oladunni Balogun<sup>1</sup>, Abidemi Ojo<sup>2</sup>, Errol Cason<sup>3</sup>, Saheed Sabiu<sup>1\*</sup>

\* **Correspondence:** Corresponding Author: email@uni.edu

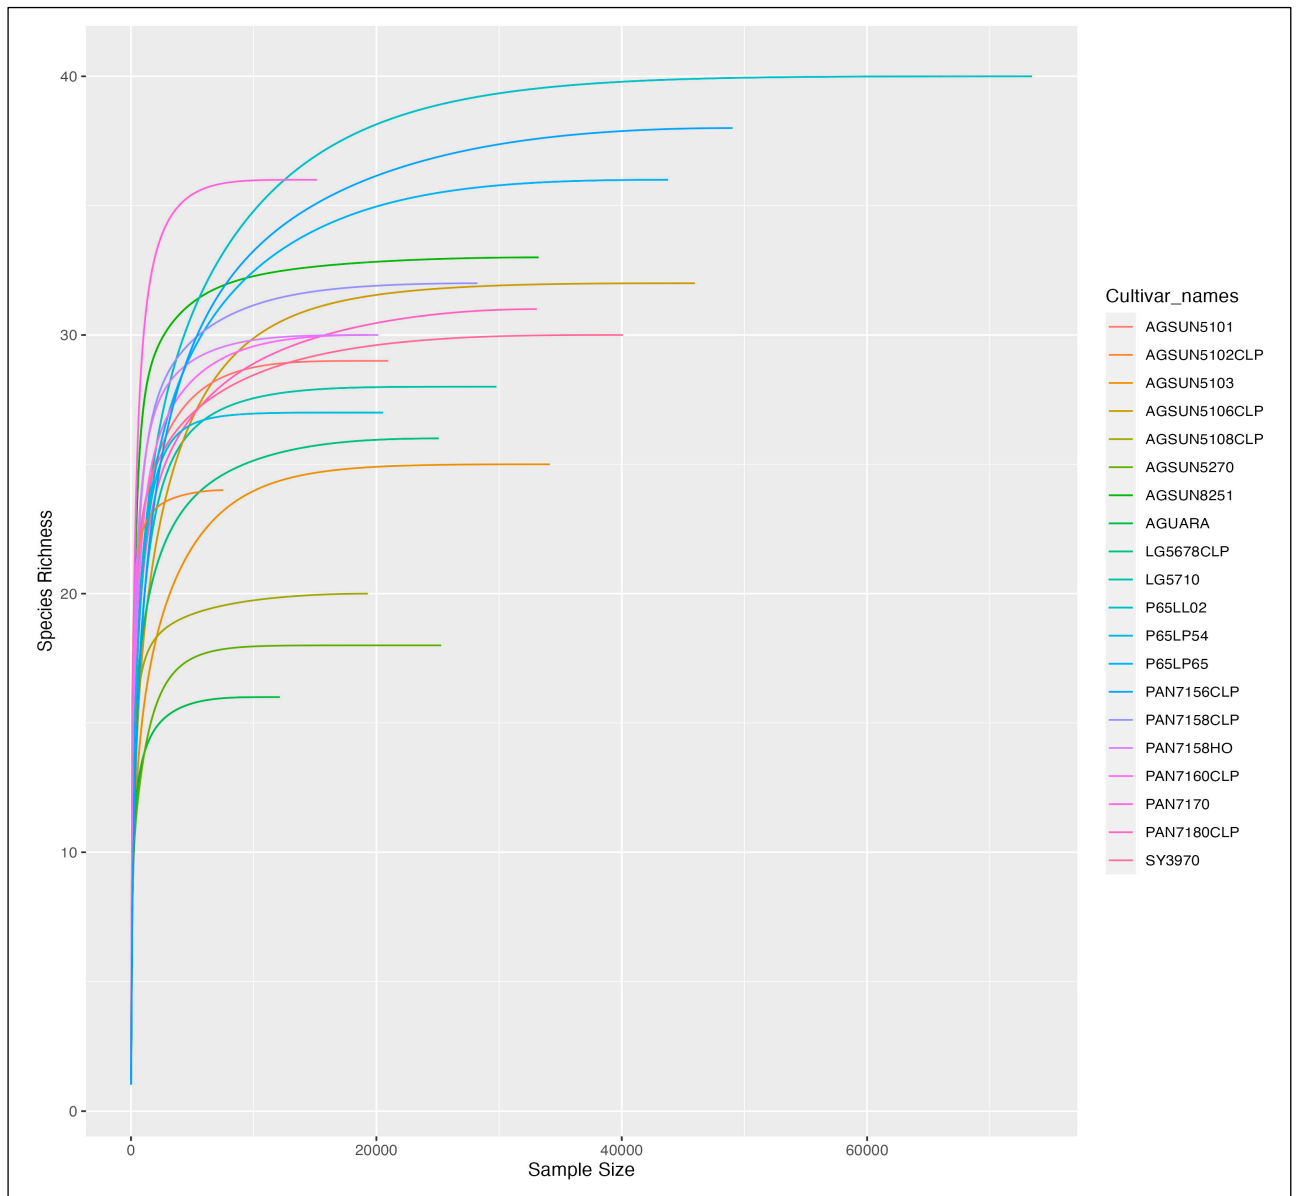

Figure S1: Rarefaction sequence curve of fungi diversity of sunflower seeds cultivars

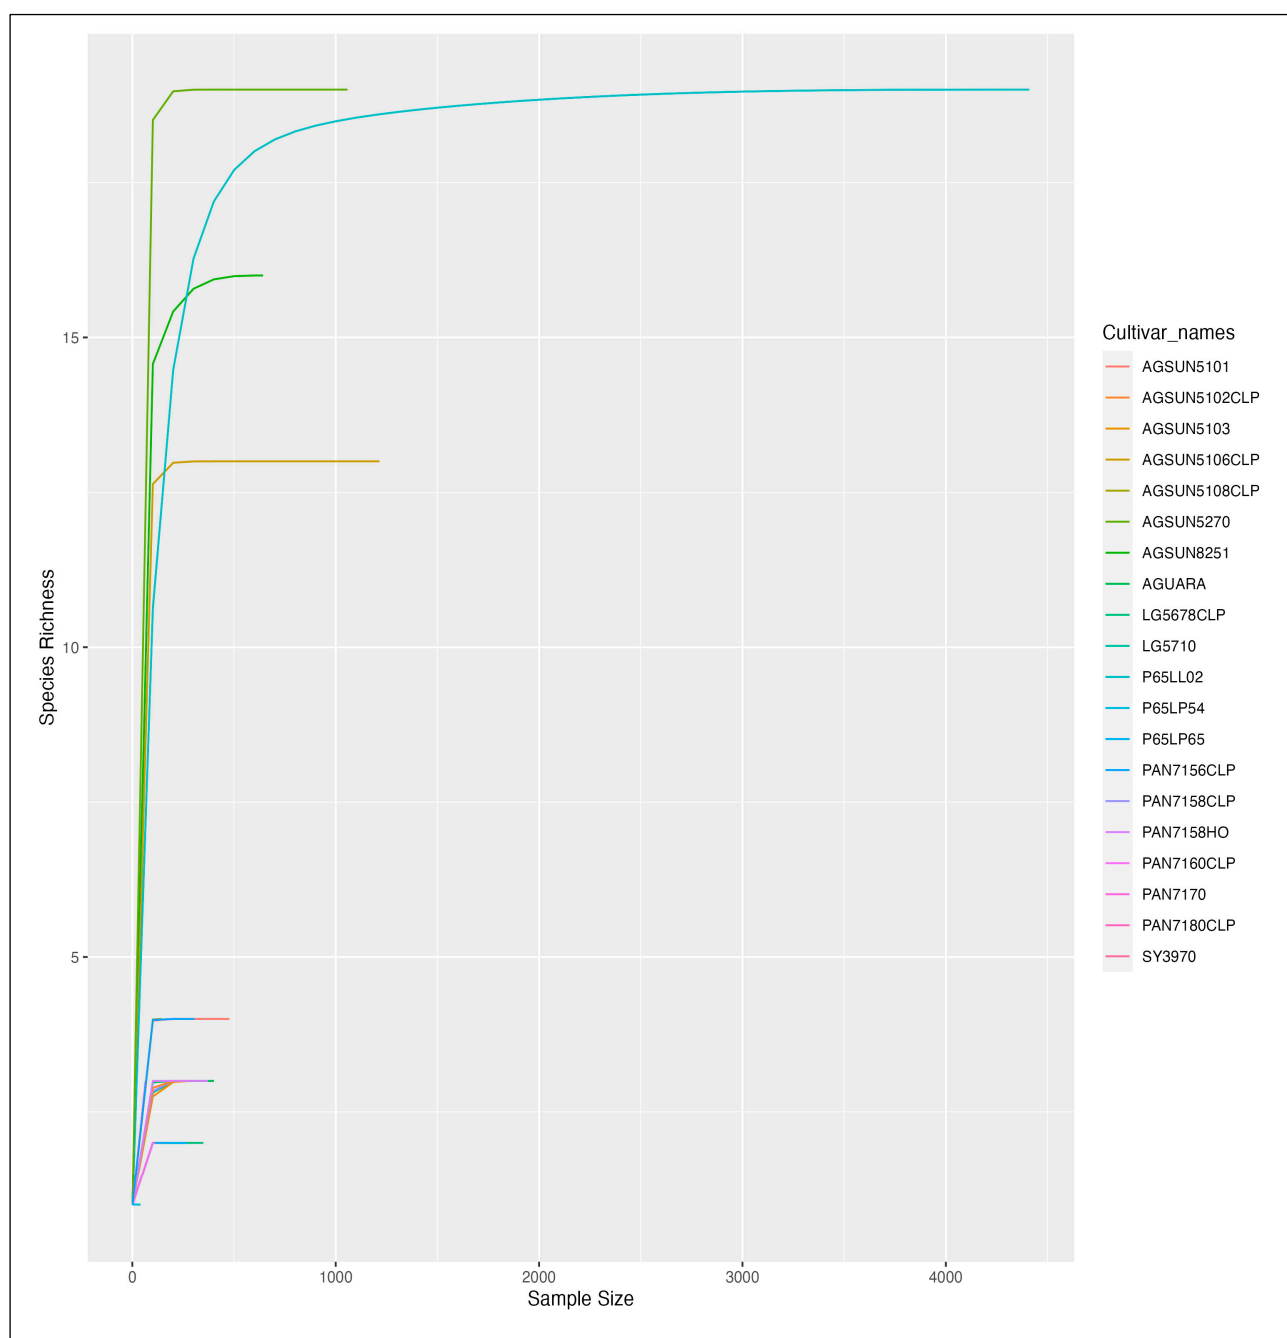

Figure S2: Rarefaction sequence curve of bacteria diversity of sunflower seeds cultivars
