# Supplementary material for: Chemical Characterization and Metagenomic Identification of Endophytic Microbiome from South African Sunflower (Helianthus annus) Seeds
Source: Microorganisms. 2023 Apr 10;11(4):988. doi: 10.3390/microorganisms11040988 (PMC10146784; doi:10.3390/microorganisms11040988)
Supplement: Supplementary file 1 [file microorganisms-11-00988-s001.zip]

Archive with 4 entries (4 files):
- Supplementary Figures_S1, S2.pdf
- Supplementary Table S1.xlsx
- Supplementary Table S2.xlsx
- Supplementary Table S3.xlsx
