# Supplementary material for: Chemical Characterization and Metagenomic Identification of Endophytic Microbiome from South African Sunflower (Helianthus annus) Seeds
Source: Microorganisms. 2023 Apr 10;11(4):988. doi: 10.3390/microorganisms11040988 (PMC10146784; doi:10.3390/microorganisms11040988)
Supplement: Supplementary file 1 [file microorganisms-11-00988-s001.zip › Supplementary Table S1.xlsx]

## Sheet: Abundance (%)
Assign No	Fatty acid components
	Caproic acid	Caprylic acid	Capric acid	Lauric acid	Myristic acid	Pentadecyclic acid	Palmitic acid	Palmitoleic acid	Margaric acid	Stearic acid	Oleic acid	Linoleic acid	Arachidic acid	Paullinic acid	Alpha-linoleic acid	Heneicosylic acid	Behenic acid	Dihomo-a-linoleic acid	Eicosatetraenoic acid	Tricosylic acid	Eicosapentaenoic acid	Lignoceric acid	Nervonic acid
	C6	C8	C10	C12	C14	C15	C16	C16:1	C17	C18	C18:1 cis	C18:2 cis	C20	C20:1	C18:3n3	C21	C22	C20:3n3	C20:4n6	C23	C20:5n3	C24	C24:1
2	0.0698806	0.222164	0.00844653	0.00951058	0.0815494	0.0314826	8.87022	NI	NI	7.94246	19.2296	61.7385	0.494564	NI	NI	NI	1.00621	NI	NI	0.0405686	NI	0.324667	NI
3	0.000690491	0.0182994	ND	0.0054314	0.100816	0.0189353	8.05127	0.0581014	0.0116912	4.69746	24.3651	61.1146	0.294149	0.0291476	0.152182	0.00626845	0.844965	0.00227675	0.0116149	0.0252197	0.00589059	0.181875	0.00409085
4	0.00060044	0.0185953	ND	0.00754612	0.0587044	0.0175328	5.8791	0.0320588	0.0190282	6.81557	23.0697	62.3265	0.357969	0.0423911	0.155933	0.00764622	0.892546	0.00191311	0.0240785	0.0290237	0.00640521	0.229712	0.00743712
5	0.0576183	0.352222	0.0487802	0.0301548	0.0790222	0.0255278	6.72318	NI	NI	8.51823	23.8712	58.6321	0.456295	NI	NI	NI	0.994942	NI	NI	0.0383173	NI	0.229999	NI
6	0.0244513	0.0933745	0.0306008	0.00726274	0.062598	0.0215101	6.41779	NI	NI	6.74833	18.1573	66.8698	0.386394	NI	NI	NI	0.978273	NI	NI	0.0269852	NI	0.199843	NI
7	0.208577	0.503655	0.0158421	0.00964133	0.061695	0.0237974	7.47289	NI	NI	8.47862	18.8302	62.7425	0.452495	NI	NI	NI	1.04085	NI	NI	0.132593	NI	0.235236	NI
8	0.000663325	0.0297782	ND	0.00507929	0.0665773	0.0199754	6.52861	0.0372346	0.0180094	2.31223	24.56	64.5163	0.340926	0.0397963	0.159626	0.0123576	1.08325	0.0025727	0.0133615	0.0279164	0.00769944	0.212236	0.00581642
9	0.00140358	0.00129955	ND	0.00421392	0.0298967	0.0182106	3.04035	0.0418296	0.0163427	3.74925	86.0376	4.96904	0.310865	0.0500946	0.244579	0.0109603	1.13045	0.00531078	0.00559561	0.0356563	0.00251225	0.280538	0.0139984
10	0.216401	0.657575	0.0201837	0.0161924	0.0755359	0.0401192	7.41637	NI	NI	6.00997	40.7252	42.4452	0.453982	NI	NI	NI	1.67226	NI	NI	0.0454472	NI	0.421957	NI
11	8.48612e-05	0.00900274	ND	0.00422233	0.0677861	0.0204911	5.32808	0.0770767	0.0197329	7.59843	24.5004	60.463	0.390125	0.0417868	0.140551	0.0132137	1.05488	0.00192994	0.00414979	0.0393775	0.00703193	0.214099	0.00455833
12	0.0731954	0.360681	0.014622	0.0125047	0.0838042	0.0289157	7.02047	NI	NI	8.74931	33.2918	48.3347	0.504198	NI	NI	NI	1.26296	NI	NI	0.0504838	NI	0.285554	NI
13	0.00075237	0.0116054	ND	0.00547183	0.113556	0.0216482	7.76722	0.0733766	0.0225104	5.78949	21.6112	62.9958	0.332682	0.032518	0.149144	0.00976841	0.807504	0.00234326	0.00153331	0.0304335	0.0140517	0.201497	0.00597626
14	0.569726	1.21251	0.71595	0.0523176	0.164404	0.0853057	15.8859	NI	NI	17.1296	29.7425	31.3017	0.944266	NI	NI	NI	2.20789	NI	NI	0.094993	NI	0.462776	NI
15	0.00833762	0.0406187	ND	0.008881	0.0696987	0.0244323	6.51044	NI	NI	6.56506	15.4389	69.8382	0.39738	NI	NI	NI	0.878668	NI	NI	0.029066	NI	0.198702	NI
16	0.00309258	0.0247611	ND	0.00497539	0.0685633	0.0190087	6.24711	0.0513231	0.0313859	6.59045	34.05	50.9788	0.39361	0.0375292	0.129774	0.016941	1.03023	0.00203515	0.0291357	0.040747	0.0104995	0.235346	0.00465733
17	0.999352	2.7503	6.6764	0.310213	0.222411	0.331179	15.648	NI	NI	18.7516	34.0638	18.3335	1.01543	NI	NI	NI	1.12903	NI	NI	0.11383	NI	0.654264	NI
18	0.0558221	0.199285	0.0456454	0.0106646	0.0824024	0.0218251	7.03497	NI	NI	7.6542	27.5606	55.3202	0.493818	NI	NI	NI	1.2665	NI	NI	0.0288684	NI	0.281083	NI
19	0.0624838	0.194859	0.0458841	0.00940464	0.0804182	0.0225131	7.17149	NI	NI	7.77576	28.0437	54.5911	0.48243	NI	NI	NI	1.26686	NI	NI	0.0332462	NI	0.282333	NI
20	0.165348	0.460894	0.0960488	0.0116964	0.0839597	0.0330482	7.47986	NI	NI	8.09564	21.5395	60.3654	0.457703	NI	NI	NI	1.13785	NI	NI	0.0330388	NI	0.205339	NI
21	0.0051528	0.0990133	ND	0.00892379	0.0757278	0.0225262	7.20094	0.036906	0.0197495	6.36881	19.6952	64.632	0.361059	0.0416767	0.181688	0.0133565	0.995999	0.00221488	0.00399563	0.0298962	0.0142193	0.181513	0.00940382
