# Supplementary material for: Chemical Characterization and Metagenomic Identification of Endophytic Microbiome from South African Sunflower (Helianthus annus) Seeds
Source: Microorganisms. 2023 Apr 10;11(4):988. doi: 10.3390/microorganisms11040988 (PMC10146784; doi:10.3390/microorganisms11040988)
Supplement: Supplementary file 1 [file microorganisms-11-00988-s001.zip › Supplementary Table S2.xlsx]

## Sheet: Concentrations (Average)
Cultivars	Fatty acids components
	Caproic acid			Caprylic acid			Capric acid			Lauric acid			Myristic acid			Pentadecyclic acid			Palmitic acid			Palmitoleic acid			Margaric acid			Stearic acid			Oleic acid			Linoleic acid			Arachidic acid			Paullinic acid			Alpha-linoleic acid			Heneicosylic acid			Behenic acid
	Mean	SEM		Mean	SEM		Mean	SEM		Mean	SEM		Mean	SEM		Mean	SEM		Mean	SEM		Mean	SEM		Mean	SEM		Mean	SEM		Mean	SEM		Mean	SEM		Mean	SEM		Mean	SEM		Mean	SEM		Mean	SEM		Mean
P65LL14	0.0701937	0.00046037		0.0887213	0.0667313		0.008149	0.00116427		0.00917033	0.0011672		0.080183	0.0007415		0.031161	0.00116587		8.87007	0.0115472		0	0		0	0		7.9409	0.00305797		19.2232	0.0119867		61.7328	0.0118903		0.494188	0.0011699		0	0		0	0		0	0		1.00607
PAN7160CLP	0.00069	1.1547e-05		0.018233	0.000120093		0	0		0.00541033	0.000115931		0.100272	0.0115502		0.0183117	0.00119602		8.05042	0.0115548		0.0580337	0.00115519		0.0112303	0.00117745		4.69715	0.00116466		24.3617	0.0116705		61.1115	0.0116462		0.291383	0.0116295		0.0290493	0.00115575		0.152061	0.00115629		0.00608933	0.00115815		0.844322
AGSUN5270	0.0006	0.00011547		0.0181983	0.00117161		0	0		0.00751533	0.000116484		0.0582347	0.0011783		0.0171777	0.00116829		5.87903	0.00115514		0.0320197	0.00115487		0.0190093	0.00115474		6.81519	0.00117012		23.0692	0.00117938		62.3222	0.0117479		0.357323	0.00119903		0.0421303	0.00116203		0.155311	0.00119585		0.00721533	0.00117461		0.890849
AGSUN 5102 CLP	0.057206	0.00117293		0.352074	0.00115707		0.04826	0.00118361		0.0300517	0.0115471		0.0790073	0.00115472		0.0255093	0.000115847		6.72106	0.0115956		0	0		0	0		8.51274	0.0118682		23.8704	0.0115539		58.6307	0.0115688		0.456098	0.00115888		0	0		0	0		0	0		0.994314
PAN 7158 CLP	0.0241503	0.00116445		0.0931247	0.00116141		0.0302003	0.00117195		0.00708767	0.00115802		0.0621993	0.00117178		0.02117	0.00116715		6.4126	0.0118353		0	0		0	0		6.74277	0.0118758		18.1571	0.00115874		66.8699	0.0115473		0.382131	0.0117421		0	0		0	0		0	0		1.97827
PAN 7170	0.208192	0.00117061		0.201418	0.151118		0.0152807	0.00118832		0.00961367	0.000116276		0.0612317	0.00117771		0.0232657	0.00118487		7.47096	0.0115871		0	0		0	0		8.47288	0.0118995		18.83	0.0115471		62.7408	0.0115778		0.450832	0.0115769		0	0		0	0		0	0		1.04085
P65LP54	0.000663	1.1547e-06		0.0292593	0.00118346		0	0		0.00502633	0.001155		0.0665257	0.000118288		0.0229917	0.00907515		6.5238	0.0110043		0.0370783	0.00115735		0.018003	0.0011547		2.31208	0.00115716		24.56	0.011547		64.5121	0.011734		0.340309	0.0115511		0.0392653	0.00118479		0.159209	0.0011734		0.0121193	0.00116085		1.08308
PAN7158 HO	0.00140133	0.000115478		0.0013	0.00011547		0	0		0.00420467	0.000115564		0.029299	0.00119278		0.0180703	0.00115684		3.04012	0.0115476		0.0412767	0.00118738		0.0161143	0.00116035		3.74308	0.0119512		86.0325	0.0118216		4.96301	0.0119339		0.310288	0.00119016		0.0500317	0.011547		0.244193	0.00117072		0.01032	0.00119822		1.13015
LG 5710	0.216134	0.00116241		0.652525	0.0118199		0.0200613	0.00115633		0.016064	0.00115647		0.0751787	0.00116844		0.0400397	0.00115538		7.41612	0.0011612		0	0		0	0		6.00996	1.16667e-05		40.7217	0.0116749		43.1084	0.655805		0.453327	0.0012002		0	0		0	0		0	0		1.67226
AGSUN8251	8.49e-05	5.7735e-06		0.009003	1.1547e-06		0	0		0.00420733	0.000115703		0.067262	0.00118405		0.0201637	0.00116624		5.32569	0.00147473		0.0770257	0.00115499		0.019711	0.000115993		7.59281	0.0118842		24.5001	0.11547		60.461	0.0115897		0.390042	0.0115471		0.0412623	0.00118413		0.140184	0.00116922		0.0130713	0.0011569		1.05429
AGSUN 5106 CLP	0.073065	0.00115653		0.252827	0.108514		0.0142073	0.00117317		0.0121683	0.00116691		0.083268	0.00118539		0.0283053	0.00119439		7.02016	0.0115481		0	0		0	0		8.7431	0.0119566		33.2906	0.0115619		48.3316	0.0116546		0.504066	0.00115659		0	0		0	0		0	0		1.26296
P65LL02	0.000750667	1.15662e-05		0.0112017	0.00117218		0	0		0.005424	0.000117938		0.113185	0.00116948		0.021616	0.000116573		7.76241	0.0117951		0.0731257	0.00116152		0.02217	0.00116715		5.78943	0.000119559		21.6104	0.0115535		62.9953	0.00118216		0.332227	0.00117687		0.032506	0.000115626		0.149115	0.000116398		0.00972267	0.000117674		0.807168
AGSUN 5101	0.569709	0.000115795		1.21084	0.0115773		0.715917	0.000116667		0.052106	0.00115956		0.164135	0.00116253		0.085302	0.000115487		15.8853	0.0011922		0	0		0	0		17.1232	0.0119804		29.7408	0.0115761		31.3006	0.115471		0.941422	0.0116342		0	0		0	0		0	0		2.20789
PAN 7180 CLP	0.00831267	0.000116163		0.0402063	0.00117299		0	0		0.008881	1.1547e-06		0.069233	0.00117797		0.024144	0.00116364		6.51015	0.0115479		0	0		0	0		6.56502	0.00115485		15.433	0.0119187		69.8327	0.0118669		0.39246	0.0118061		0	0		0	0		0	0		0.872889
AGSUN5103	0.003031	0.00115512		0.0247203	0.000117247		0	0		0.004925	0.000118145		0.068521	0.000117364		0.019003	0.000115509		6.24704	0.0011553		0.0511077	0.00115971		0.0311287	0.00116185		6.59015	0.00116453		34.0433	0.0120176		50.9729	0.0119162		0.393203	0.00117247		0.0371763	0.00116809		0.129725	0.000118075		0.0163137	0.00119655		1.03008
AGUARA	0.999317	0.000116764		2.7501	0.0115474		6.67613	0.00116253		0.310071	0.0115472		0.222137	0.0011628		0.330393	0.0115537		15.6427	0.0118524		0	0		0	0		18.7512	0.00117023		34.0633	0.00118661		18.3312	0.0116071		1.01514	0.00116352		0	0		0	0		0	0		1.12903
LG 5678 CLP	0.055274	0.00118676		0.199228	0.000118895		0.045215	0.00117455		0.0106217	0.000117485		0.082134	0.00116245		0.021275	0.001187		7.03432	0.00119876		0	0		0	0		7.65407	0.0011566		27.5602	0.0115485		55.3201	0.0115472		0.493273	0.00118646		0	0		0	0		0	0		1.2665
SY 3970	0.0621613	0.00116592		0.194286	0.00118967		0.0452947	0.00119171		0.00940167	0.000115482		0.0801393	0.00116308		0.0225043	0.000115551		7.17116	0.00116629		0	0		0	0		7.77525	0.00118181		28.0432	0.00117547		54.591	0.00115564		0.482143	0.00116356		0	0		0	0		0	0		1.26686
P65LP65	0.165116	0.00116051		0.460298	0.00119253		0.0960163	0.00115482		0.011632	0.000119822		0.08332	0.00119822		0.033016	0.00115481		7.47329	0.0120056		0	0		0	0		8.09521	0.00117436		21.5332	0.0119751		60.3654	0.00011547		0.457701	0.000115474		0	0		0	0		0	0		1.13785
PAN7156CLP	0.00511767	0.000116814		0.0990377	8.74763e-05		0	0		0.00892133	1.16237e-05		0.0752427	0.00117992		0.022522	1.17189e-05		7.20031	0.0115513		0.036302	0.00119354		0.0197167	0.000116667		6.36881	1.1547e-05		19.6951	0.00115747		64.6313	0.00120002		0.36102	0.00115487		0.0416257	0.000118288		0.181629	0.000119138		0.013319	0.000117023		0.995333
Not indicated or detected fatty acid components are depicted with "0"
[truncated: 13 more columns]
