# Supplementary material for: Chemical Characterization and Metagenomic Identification of Endophytic Microbiome from South African Sunflower (Helianthus annus) Seeds
Source: Microorganisms. 2023 Apr 10;11(4):988. doi: 10.3390/microorganisms11040988 (PMC10146784; doi:10.3390/microorganisms11040988)
Supplement: Supplementary file 1 [file microorganisms-11-00988-s001.zip › Supplementary Table S3.xlsx]

## Sheet: Fungi Abundance_Phylum
	Agricol							LimaGrain			Pannar						Pioneer			Sensako
Phylum	AGSUN5108CLP	AGSUN5270	AGSUN5102CLP	AGSUN8251	AGSUN5106CLP	AGSUN5101	AGSUN5103	LG5710	AGUARA	LG5678CLP	PAN7160CLP	PAN7170	PAN7158HO	PAN7156CLP	PAN7180CLP	PAN7158CLP	P65LP54	P65LL02	P65LP65	SY3970
Ascomycota	46.28	90.63	34.55	7.21	6.15	12.42	29.9	40.27	80.93	48.14	73.1	45.28	53.66	16.34	20.81	52.78	85.56	53.61	10.06	30.45
Mortierellomycota	0.03	0	0	0	0.03	0.04	0.04	0	0	0	0.13	0.57	0	0.02	0.03	0.02	0.02	0.01	0.03	0.02
Basidiomycota	1.11	4.74	4.93	2.26	0.06	7.83	0.07	0.41	0	0.95	0.34	0.86	1.2	0.34	0.02	1.82	0.14	0.31	0.08	0.96
Mucoromycota	0	0	0	1.29	0	0.02	0	0	0	0.01	0.45	0	0	0	0.01	0	0	0	0	0
unidentified	52.58	4.63	60.52	89.25	93.75	79.69	69.99	59.32	19.07	50.9	25.98	53.29	45.15	83.29	79.14	45.37	14.28	46.06	89.84	68.56

## Sheet: Fungi abundance_Genus
					Agricol							LimaGrain			Pannar						Pioneer			Sensako
Phylum	Class	Order	Family	Genus	AGSUN5108CLP	AGSUN5270	AGSUN5102CLP	AGSUN8251	AGSUN5106CLP	AGSUN5101	AGSUN5103	LG5710	AGUARA	LG5678CLP	PAN7160CLP	PAN7170	PAN7158HO	PAN7156CLP	PAN7180CLP	PAN7158CLP	P65LP54	P65LL02	P65LP65	SY3970
Ascomycota	Sordariomycetes	Hypocreales	Hypocreales_fam_Incertae_sedis	Acremonium	0	0	0	0	0	0	0	0	0	0	0	0.44	0.22	0	0	0	0	0	0	0
Ascomycota	Dothideomycetes	Tubeufiales	Wiesneriomycetaceae	Spissiomyces	0	0	0	0	0	0.75	0	0	0	0	0.24	0	0	0	0	0	0	0	0	0
Mortierellomycota	Mortierellomycetes	Mortierellales	Mortierellaceae	Mortierella	0.03	0	0	0	0.03	0.04	0.04	0	0	0	0.13	0.57	0	0.02	0.03	0.02	0.02	0.01	0.03	0.02
Ascomycota	Dothideomycetes	Capnodiales	unidentified	unidentified	0	0	0	0	0	0	0	0	0	0	0	0	0	0	0	0.53	0	0	0	0
Ascomycota	Sordariomycetes	Hypocreales	Bionectriaceae	Clonostachys	0	0	0.99	0	0	0	0	0	0	0	0	0	0	0	0	0	0	0	0	0
Ascomycota	Sordariomycetes	Sordariomycetes_ord_Incertae_sedis	Sordariomycetes_fam_Incertae_sedis	Distoseptispora	0	0	1.31	0	0	0	0	0	0	0	0	0	0	0	0	0	0	0	0	0
Ascomycota	Leotiomycetes	Helotiales	Sclerotiniaceae	Sclerotinia	0	0	0	0	0	0	0	0	0	0	0	2.19	0	0	0.18	0	0	0	0	0
unidentified	unidentified	unidentified	unidentified	unidentified	52.58	4.63	60.52	89.39	93.76	80.45	69.99	59.32	19.07	50.9	25.98	53.55	45.32	83.3	79.25	45.52	14.28	46.06	89.84	68.97
Ascomycota	Saccharomycetes	Saccharomycetales	Debaryomycetaceae	Debaryomyces	0	0	0	0	0	0	0	0	0	0	0	0	0.41	0	0	0	0	0	0	0
Ascomycota	Dothideomycetes	Capnodiales	Cladosporiaceae	Toxicocladosporium	0.54	0	0	0	0	0	0	0	0	0	0	0	0	0	0	0	0	0	0	0
Basidiomycota	Ustilaginomycetes	Ustilaginales	Ustilaginaceae	Ustilago	0	0	0	0	0	0	0	0	0	0.01	0	0	0	0	0	0	0	0	0	0
Basidiomycota	Agaricomycetes	Agaricales	Bolbitiaceae	Panaeolus	0	0	0	0.71	0	0	0	0	0	0	0	0	0	0.01	0	0	0	0.01	0	0
Ascomycota	Dothideomycetes	Capnodiales	Cladosporiaceae	Rachicladosporium	0	0	0	0	0	0	0	0	0	0.29	0	0	0	0	0	0	0	0	0	0
Ascomycota	Sordariomycetes	Hypocreales	Sarocladiaceae	Parasarocladium	0.21	0	0	0	0	0	0	0	0	0	0	0	0	0	0	0	0	0	0	0
Basidiomycota	Agaricomycetes	Atheliales	Tylosporaceae	unidentified	0	4.74	0	0.04	0.02	0.07	0.02	0.02	0	0	0	0.03	0.01	0.01	0	0.02	0	0.01	0.01	0
Basidiomycota	Cystobasidiomycetes	Cystobasidiomycetes_ord_Incertae_sedis	Buckleyzymaceae	Buckleyzyma	0	0	0.68	0	0	0	0	0	0	0	0	0	0	0	0	0	0	0	0	0
Ascomycota	Dothideomycetes	Pleosporales	Leptosphaeriaceae	Alternariaster	7.1	0.04	0.12	0.47	0.37	0.38	0.11	0.31	0.03	0.09	0.68	0.15	0.09	0.15	0.13	0.09	0.04	0.1	0.18	0.13
Ascomycota	Eurotiomycetes	Eurotiales	Aspergillaceae	Aspergillus	0	0	0	0	0.05	0.05	0.05	0.11	0	0.02	0.06	6.38	0.02	0.06	0.04	0.26	0.13	0.03	6.33	0.01
Ascomycota	Leotiomycetes	Helotiales	Helotiaceae	Heterosphaeria	0	0	0	0	0	0	0	0.06	0	0	0	0	0	0	0	0	0	0	0	0
Ascomycota	Dothideomycetes	Pleosporales	Phaeosphaeriaceae	Paraphoma	0	0	0	0	0	0	0	0	0	0	0	0	0	0.03	0	0	0	0	0	0
Ascomycota	Sordariomycetes	Hypocreales	Nectriaceae	Fusarium	0	0	1.52	0.21	0	0	0	0	0	0.02	0	0	0.12	0	0	0.11	0.05	0	0	0
Basidiomycota	Malasseziomycetes	Malasseziales	Malasseziaceae	Malassezia	0.56	0	0	0	0	0	0.05	0	0	0	0	0.05	0	0.01	0	0	0	0.01	0	0
Basidiomycota	Tremellomycetes	Tremellales	Tremellaceae	Cryptococcus	0.54	0	0	0	0.04	0	0	0	0	0	0	0	0	0	0	0	0	0	0	0
Ascomycota	Sordariomycetes	Hypocreales	Stachybotryaceae	Striaticonidium	0	0	0	0	0	0	0	0	0	0	0	0	0	0	0	0	0	0.09	0	0
Basidiomycota	Agaricomycetes	Agaricales	Typhulaceae	Typhula	0	0	0	0.01	0	1.74	0	0	0	0	0	0	0	0	0	0	0	0	0	0
Ascomycota	Sordariomycetes	Sordariales	Chaetomiaceae	Chaetomium	0.15	0	0	0	0	0	0	0	0	0	0	0	0	0	0	0	0	0	0	0
Ascomycota	Leotiomycetes	Helotiales	Hyaloscyphaceae	Hyaloscypha	0	0	0	0	0	0	0	0	0	0	0	0	0	0	0	0	0	0	0.05	0
Ascomycota	Saccharomycetes	Saccharomycetales	Saccharomycetaceae	Eremothecium	0.15	1.12	0.25	0.5	0.36	0.4	0.31	0.23	0.09	0.34	0.18	0.46	0.29	0.32	2.76	0.25	0.1	51.23	0.46	0.37
Ascomycota	Arthoniomycetes	Lichenostigmatales	Phaeococcomycetaceae	Phaeococcomyces	0	0	0	0	0	0	0	0	0	0.04	0	0	0	0	0	0	0	0	0	0
Ascomycota	Dothideomycetes	Pleosporales	Pleosporaceae	Alternaria	36.4	89.44	14.13	3.24	4.92	5.42	28.71	38.18	75.34	30.52	70.84	31.64	46.9	15.32	16.14	25.15	77.45	0.96	1.14	22.2
Ascomycota	Leotiomycetes	Helotiales	Rutstroemiaceae	Lambertella	0	0	0	0	0	0	0	0.04	0	0	0	0	0	0	0	0	0	0	0	0
Basidiomycota	Agaricomycetes	Russulales	Russulaceae	Russula	0	0	0	0	0	0	0	0	0	0.94	0	0.79	0	0.15	0	0	0	0.28	0	0
Ascomycota	Dothideomycetes	Pleosporales	Didymosphaeriaceae	Pseudopithomyces	0	0	0	0	0	0	0	0	0	1.09	0	0	0	0	0	0	0	0	0	0
Ascomycota	Eurotiomycetes	Eurotiales	Aspergillaceae	Penicillium	0.79	0	3.84	1.31	0	2.62	0.02	0.1	0.21	0.07	0	0.43	0.98	0.11	0.1	0	0.41	0.26	0.1	1.38
Ascomycota	Sordariomycetes	Xylariales	Diatrypaceae	Eutypella	0	0	0	0	0.01	0	0	0	0	0	0	2.15	0	0	0	0	0	0	0	0
Ascomycota	Pezizomycotina_cls_Incertae_sedis	Pezizomycotina_ord_Incertae_sedis	Pezizomycotina_fam_Incertae_sedis	Botryoderma	0	0	0.95	0	0	0	0	0	0	0	0	0	0	0	0	0	0	0	0	0
Ascomycota	Dothideomycetes	Dothideales	unidentified	unidentified	0	0	0	0	0	0.6	0	0	0	0	0	0.57	0	0	0	0	0	0	0	0
Basidiomycota	Agaricomycetes	Sebacinales	unidentified	unidentified	0	0	0	0.28	0	0	0	0	0	0	0	0	0	0	0	0	0	0	0	0
Basidiomycota	Agaricomycetes	Agaricales	Inocybaceae	Inocybe	0	0	0	0	0	0	0	0	0	0	0	0	0	0	0	0.75	0	0	0	0
Ascomycota	Eurotiomycetes	Chaetothyriales	unidentified	unidentified	0	0	0	0	0	0	0	0	0	0	0	0	0	0	0	0	0	0.16	0	0
Ascomycota	Sordariomycetes	Hypocreales	Hypocreales_fam_Incertae_sedis	Sarocladium	0	0	0	0	0	0	0	0	0	0	0	0	0	0	0	0.16	0	0	0	0
Basidiomycota	Microbotryomycetes	Microbotryomycetes_ord_Incertae_sedis	Microbotryomycetes_fam_Incertae_sedis	Curvibasidium	0	0	0	0.2	0	0	0	0	0	0	0	0	0	0	0	0	0	0	0.03	0
Basidiomycota	Tremellomycetes	Cystofilobasidiales	Mrakiaceae	Tausonia	0	0	0	0.53	0	0	0	0	0	0	0	0	0.12	0.07	0	0	0	0	0	0
Basidiomycota	Agaricomycetes	Polyporales	Ganodermataceae	Ganoderma	0	0	4.25	0	0	0.56	0	0	0	0	0	0	0	0	0	0	0	0	0	0
Ascomycota	Leotiomycetes	Thelebolales	Pseudeurotiaceae	Pseudogymnoascus	0	0	0	0	0	0	0	0.09	0	0.16	0	0	0	0	0.16	0	0	0	0	0
Ascomycota	Sordariomycetes	Hypocreales	Stachybotryaceae	Stachybotrys	0	0	0	0.29	0	0	0	0	0	0	0	0	0	0	0	0	0	0	0	0
Ascomycota	Dothideomycetes	Pleosporales	Pleosporaceae	Bipolaris	0	0	0	0	0	0	0	0	3.5	0	0	0	0	0	0	0	0	0	0.27	0
Ascomycota	Dothideomycetes	Capnodiales	Dissoconiaceae	Dissoconium	0	0	0	0	0	0	0	0	0	0	0	0	0	0	0	0	0	0	0	0.37
Ascomycota	Eurotiomycetes	Chaetothyriales	Trichomeriaceae	Bradymyces	0	0	0	0	0	0	0	0	0	0	0	0	0.8	0	0.01	0	0	0	0	0
Basidiomycota	Tremellomycetes	Filobasidiales	Filobasidiaceae	Naganishia	0	0	0	0.49	0	2.83	0	0.15	0	0	0.01	0	0	0	0.01	0	0.14	0	0.01	0.01
Ascomycota	Sordariomycetes	Diaporthales	Diaporthaceae	Diaporthe	0.01	0	0.03	0.03	0.02	0.04	0.03	0.03	0	12.07	0	0.03	0.02	0.03	0.02	0.01	0	0.02	0.03	0
Ascomycota	Dothideomycetes	Dothideales	Aureobasidiaceae	Aureobasidium	0.07	0.03	9.84	0.38	0.1	0.15	0.35	0.07	0.03	0.68	0.49	0.21	0.55	0.09	0.08	24.19	0.14	0.06	0.84	3.25
Ascomycota	Saccharomycetes	Saccharomycetales	Saccharomycetaceae	Kluyveromyces	0	0	0	0	0	0	0	0.16	0	0	0	0	0	0	0	0	0	0	0	0
Mucoromycota	Mucoromycetes	Mucorales	Mucoraceae	Mucor	0	0	0	1.29	0	0.02	0	0	0	0.01	0.45	0	0	0	0.01	0	0	0	0	0
Ascomycota	Dothideomycetes	Pleosporales	Pleosporaceae	Stemphylium	0	0	0	0	0	0	0	0	1.2	0	0	0	0	0	0	0	0	0	0	0
Ascomycota	Saccharomycetes	Saccharomycetales	Saccharomycetales_fam_Incertae_sedis	Candida	0.87	0	0	0	0	0	0	0	0	0	0	0	0	0	0	0.29	0	0	0	0
Basidiomycota	Agaricomycetes	Agaricales	Marasmiaceae	Marasmius	0	0	0	0	0	0.02	0	0	0	0	0	0	0	0	0	0	0	0	0.01	0.96
Ascomycota	Saccharomycetes	Saccharomycetales	Debaryomycetaceae	Meyerozyma	0	0	0	0	0	0	0	0	0	0	0	0	0	0	0	0	0	0.08	0	0
Ascomycota	Dothideomycetes	Pleosporales	Torulaceae	Torula	0	0	0	0.05	0	0	0	0	0	0	0	0	0	0	0	0	0	0	0	0
Basidiomycota	Tremellomycetes	Filobasidiales	Filobasidiaceae	Filobasidium	0	0	0	0	0	0	0	0.24	0	0	0.33	0	0	0	0	0	0	0	0	0
Ascomycota	Saccharomycetes	Saccharomycetales	Saccharomycetaceae	Saccharomyces	0	0	0	0.04	0.02	0.06	0	0.19	0	0	0.03	0	2.1	0	0.15	0.74	6.91	0.01	0.08	0
Ascomycota	Eurotiomycetes	Chaetothyriales	Chaetothyriales_fam_Incertae_sedis	Neophaeococcomyces	0	0	0	0	0	0	0	0	0	0	0	0	0	0	0	0	0	0.5	0.01	0
Basidiomycota	Agaricomycetes	Polyporales	Meruliaceae	Phlebia	0	0	0	0	0	2.67	0	0	0	0	0	0	0	0.01	0.01	0.01	0	0.01	0	0
Ascomycota	Dothideomycetes	Capnodiales	Cladosporiaceae	Cladosporium	0	0	0	0.55	0.16	1.12	0.32	0.7	0.53	2.76	0.57	0.34	0.71	0.22	0.83	0.86	0.32	0.12	0.37	2.34
Ascomycota	Dothideomycetes	Botryosphaeriales	Botryosphaeriaceae	Sardiniella	0	0	0	0	0.05	0	0	0	0	0	0	0	0	0	0	0	0	0	0	0
Basidiomycota	Cystobasidiomycetes	Erythrobasidiales	Erythrobasidiaceae	Erythrobasidium	0	0	0	0	0	0	0	0	0	0	0	0	0	0	0	0.13	0	0	0	0
Basidiomycota	Agaricomycetes	Agaricales	Lycoperdaceae	Disciseda	0	0	0	0	0	0	0	0	0	0	0	0	0	0.09	0	0.92	0	0	0.01	0
Ascomycota	Sordariomycetes	Melanosporales	Melanosporaceae	Melanospora	0	0	0	0	0	0	0	0	0	0	0	0	0.2	0	0	0	0	0	0	0
Ascomycota	Leotiomycetes	Erysiphales	Erysiphaceae	Erysiphe	0	0	0	0	0.1	0	0	0	0	0	0	0	0	0	0	0	0	0	0	0
Ascomycota	Dothideomycetes	Pleosporales	Periconiaceae	Periconia	0	0	0.31	0	0	0	0	0	0	0	0	0	0.04	0	0	0	0	0	0	0
Basidiomycota	Agaricomycetes	Agaricales	Pleurotaceae	Hohenbuehelia	0	0	0	0	0	0	0	0	0	0	0	0	1.07	0	0	0	0	0	0	0
Ascomycota	Eurotiomycetes	Chaetothyriales	Herpotrichiellaceae	Coniosporium	0	0	1.28	0	0	0	0	0	0	0	0	0	0	0	0.1	0	0	0	0.18	0

## Sheet: Bacteria abundance_Phylum
	Agricol							LimaGrain			Pannar						Pioneer			Sensako
Phylum	AGSUN5108CLP	AGSUN5270	AGSUN5102CLP	AGSUN8251	AGSUN5106CLP	AGSUN5101	AGSUN5103	LG5710	AGUARA	LG5678CLP	PAN7160CLP	PAN7170	PAN7158HO	PAN7156CLP	PAN7180CLP	PAN7158CLP	P65LP54	P65LL02	P65LP65	SY3970
Actinobacteria	0	0	0	0.466563	0	0	0	0	0	0	0	0	0	0	0	1.33333	0	0	0	0
Firmicutes	3.47222	50	87.1528	63.1415	80.823	25.7862	1.09091	1.35135	0	0	0	63.0769	0	0	0	0	0	97.3016	0	0
Proteobacteria	96.5278	35.4442	12.8472	36.3919	19.177	74.2138	98.9091	98.6486	100	100	100	36.9231	100	100	100	98.6667	100	2.69841	100	100
Bacteroidetes	0	14.5558	0	0	0	0	0	0	0	0	0	0	0	0	0	0	0	0	0	0

## Sheet: Bacteria abundance_Genus
					Agricol							LimaGrain			Pannar						Pioneer			Sensako
Phylum	Class	Order	Family	Genus	AGSUN5108CLP	AGSUN5270	AGSUN5102CLP	AGSUN8251	AGSUN5106CLP	AGSUN5101	AGSUN5103	LG5710	AGUARA	LG5678CLP	PAN7160CLP	PAN7170	PAN7158HO	PAN7156CLP	PAN7180CLP	PAN7158CLP	P65LP54	P65LL02	P65LP65	SY3970
Bacteroidetes	Bacteroidia	Chitinophagales	Chitinophagaceae	Segetibacter	0	3.26371	0	0	0	0	0	0	NA	NA	NA	0	NA	NA	NA	0	NA	0	NA	NA
Actinobacteria	Actinobacteria	Corynebacteriales	Corynebacteriaceae	Corynebacterium_1	0	0	0	0	0	0	0	0	NA	NA	NA	0	NA	NA	NA	100	NA	0	NA	NA
Firmicutes	Bacilli	Bacillales	Bacillaceae	Bacillus	0	0	100	100	64.8676	87.8049	0	100	NA	NA	NA	0	NA	NA	NA	0	NA	93.8942	NA	NA
Firmicutes	Bacilli	Bacillales	Staphylococcaceae	Staphylococcus	0	6.52742	0	0	35.1324	0	100	0	NA	NA	NA	0	NA	NA	NA	0	NA	6.1058	NA	NA
Bacteroidetes	Bacteroidia	Flavobacteriales	Weeksellaceae	Chryseobacterium	0	4.047	0	0	0	0	0	0	NA	NA	NA	0	NA	NA	NA	0	NA	0	NA	NA
Firmicutes	Erysipelotrichia	Erysipelotrichales	Erysipelotrichaceae	Erysipelotrichaceae_UCG-003	55.5556	9.79112	0	0	0	0	0	0	NA	NA	NA	0	NA	NA	NA	0	NA	0	NA	NA
Bacteroidetes	Bacteroidia	Chitinophagales	Chitinophagaceae	Terrimonas	0	3.39426	0	0	0	0	0	0	NA	NA	NA	0	NA	NA	NA	0	NA	0	NA	NA
Firmicutes	Bacilli	Lactobacillales	Lactobacillaceae	Lactobacillus	0	17.3629	0	0	0	0	0	0	NA	NA	NA	0	NA	NA	NA	0	NA	0	NA	NA
Firmicutes	Bacilli	Bacillales	Paenibacillaceae	Paenibacillus	0	0	0	0	0	12.1951	0	0	NA	NA	NA	100	NA	NA	NA	0	NA	0	NA	NA
Firmicutes	Bacilli	Lactobacillales	Streptococcaceae	Streptococcus	0	8.09399	0	0	0	0	0	0	NA	NA	NA	0	NA	NA	NA	0	NA	0	NA	NA
Proteobacteria	Gammaproteobacteria	Betaproteobacteriales	Neisseriaceae	Neisseria	0	2.61097	0	0	0	0	0	0	NA	NA	NA	0	NA	NA	NA	0	NA	0	NA	NA
Firmicutes	Clostridia	Clostridiales	Peptostreptococcaceae	Peptoclostridium	0	10.1828	0	0	0	0	0	0	NA	NA	NA	0	NA	NA	NA	0	NA	0	NA	NA
Proteobacteria	Gammaproteobacteria	Pseudomonadales	Moraxellaceae	Acinetobacter	44.4444	8.22454	0	0	0	0	0	0	NA	NA	NA	0	NA	NA	NA	0	NA	0	NA	NA
Bacteroidetes	Bacteroidia	Flavobacteriales	Crocinitomicaceae	Crocinitomix	0	9.39948	0	0	0	0	0	0	NA	NA	NA	0	NA	NA	NA	0	NA	0	NA	NA
Firmicutes	Erysipelotrichia	Erysipelotrichales	Erysipelotrichaceae	Allobaculum	0	3.91645	0	0	0	0	0	0	NA	NA	NA	0	NA	NA	NA	0	NA	0	NA	NA
Firmicutes	Clostridia	Clostridiales	Clostridiaceae_1	Clostridium_sensu_stricto_1	0	5.74413	0	0	0	0	0	0	NA	NA	NA	0	NA	NA	NA	0	NA	0	NA	NA
Firmicutes	Clostridia	Clostridiales	Family_XI	Anaerococcus	0	7.44125	0	0	0	0	0	0	NA	NA	NA	0	NA	NA	NA	0	NA	0	NA	NA
